# Supplementary material for: Mast cells rescue implantation defects caused by c-kit deficiency
Source: PubMed Central journal article supplement — Cell Death Dis. 2013 Jan 17;4(1):e462–. doi: 10.1038/cddis.2012.214 (PMC3564001; doi:10.1038/cddis.2012.214), 2013-01-17

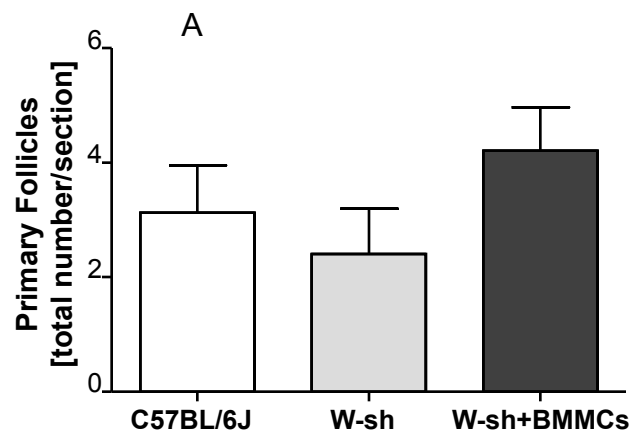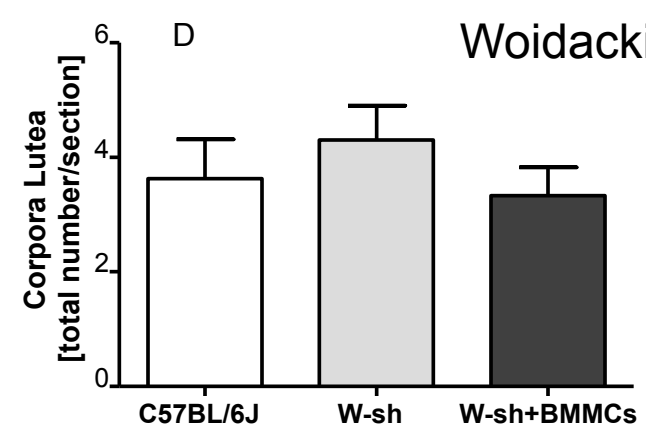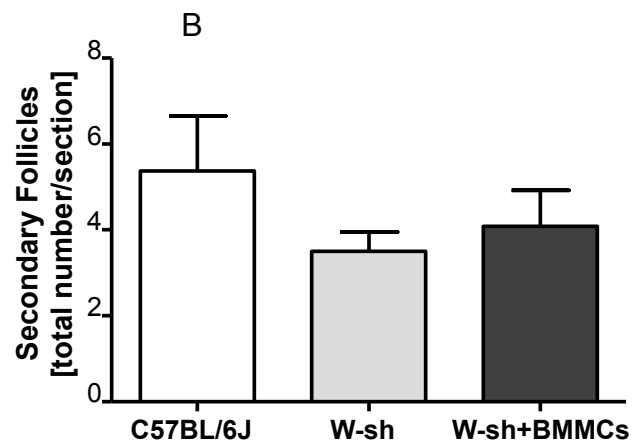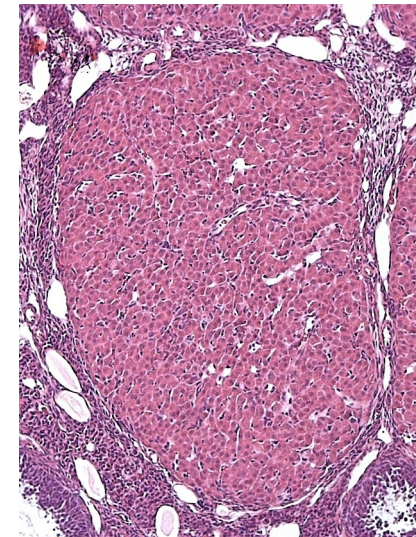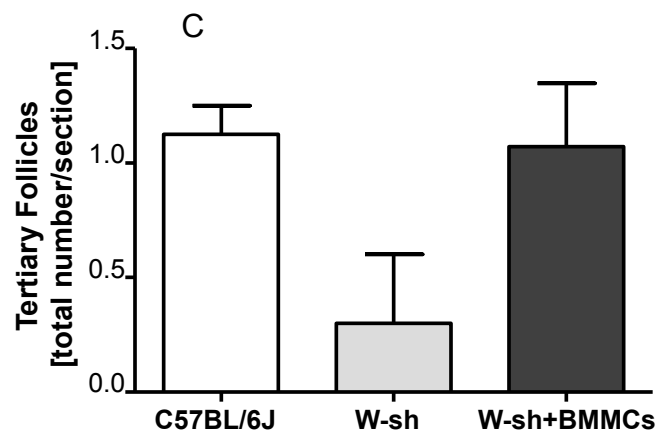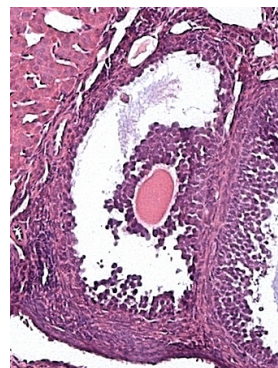

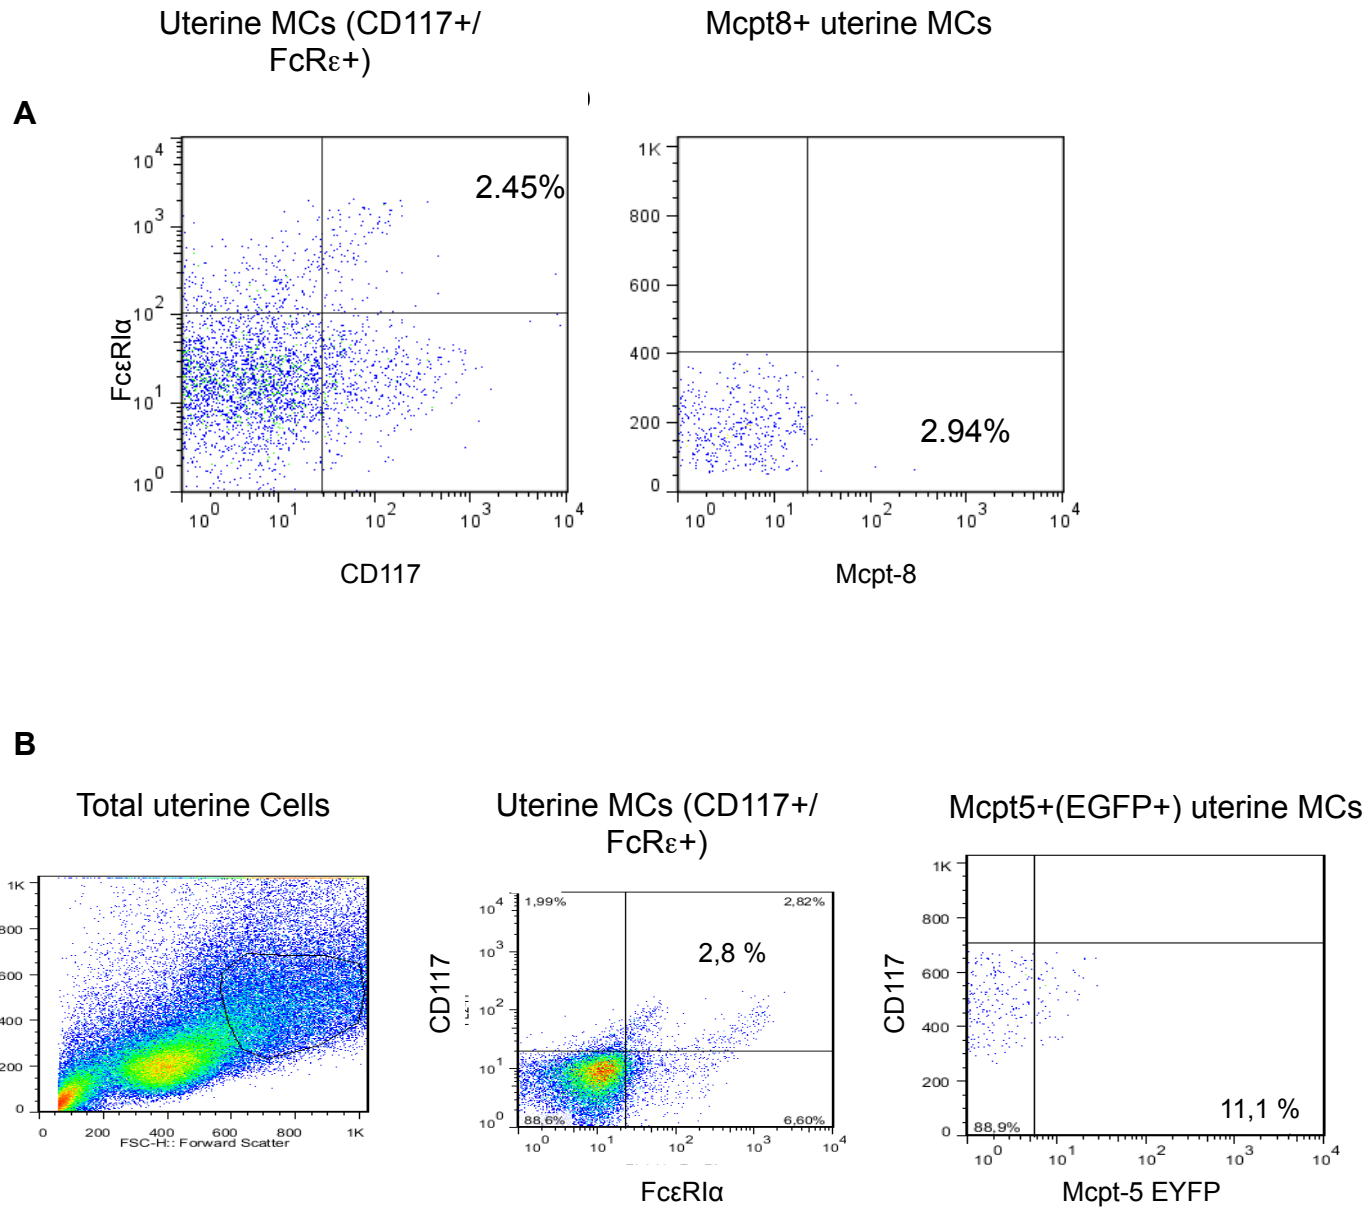

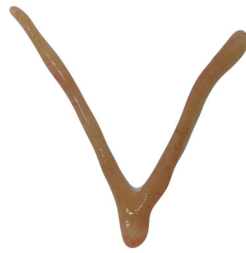

**C57BL/6J  
(virgin)**

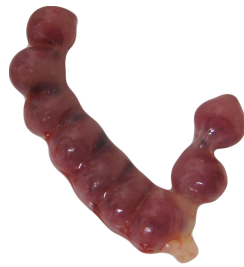

**C57BL/6J  
(gd 10)**

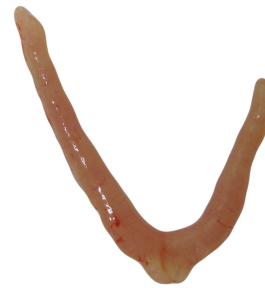

**W-sh with no  
implantations after  
successful mating  
(gd10)**

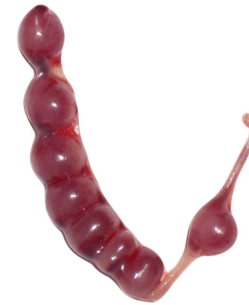

**W-sh + local BMMCs  
(gd 10)**

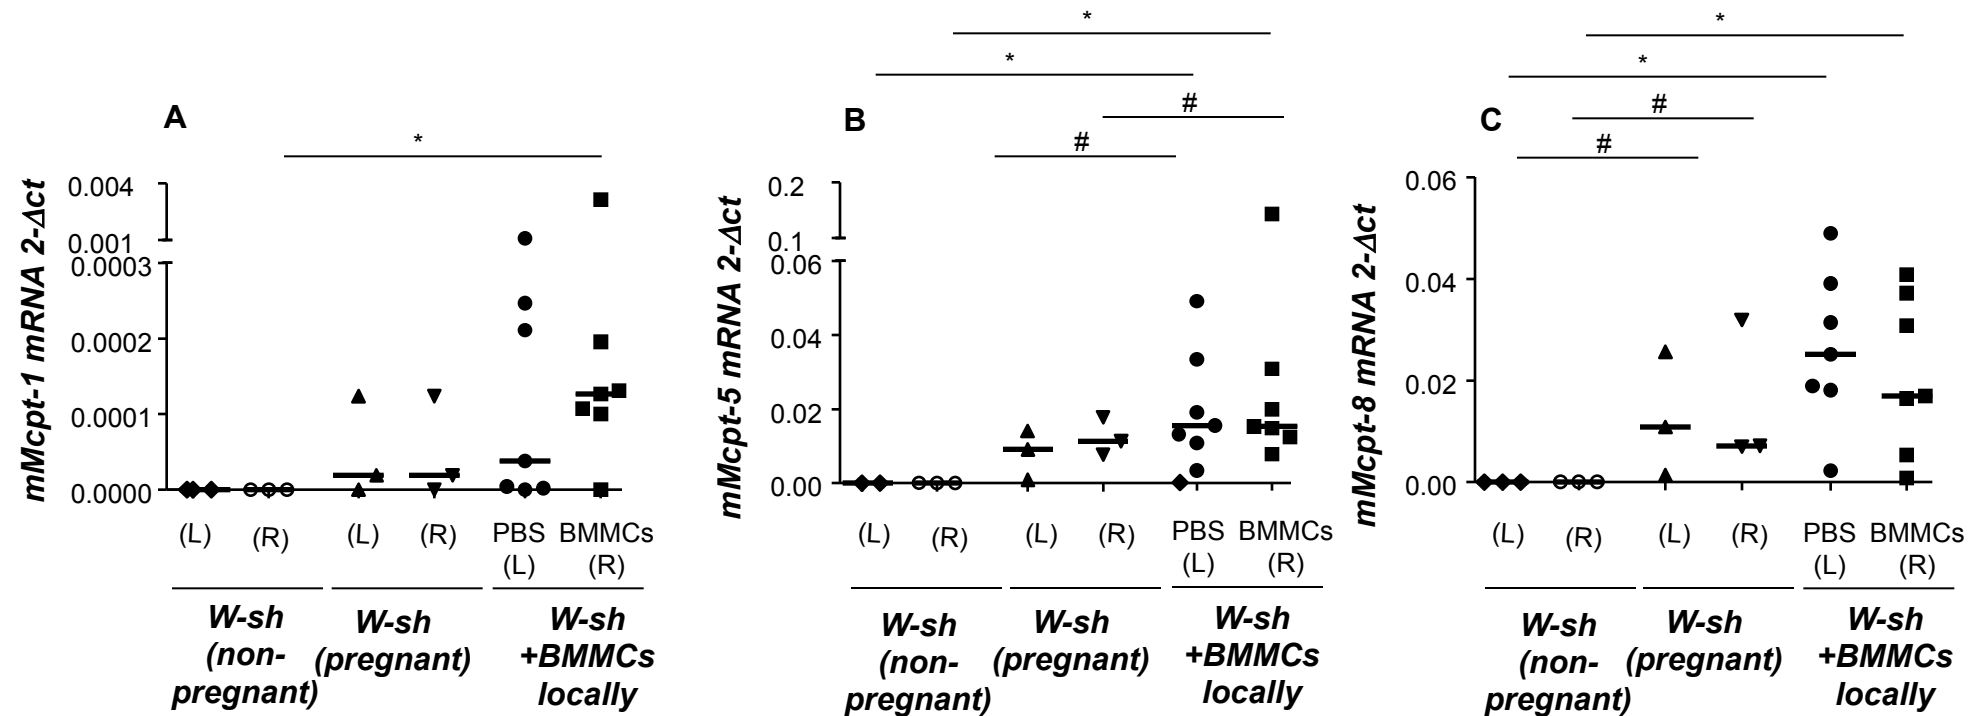

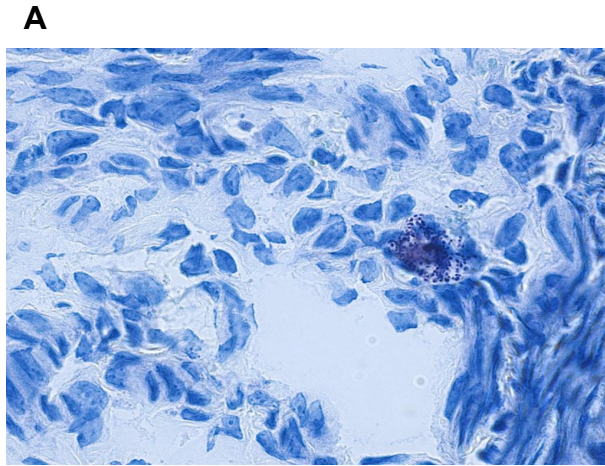

Reconstituted Horn

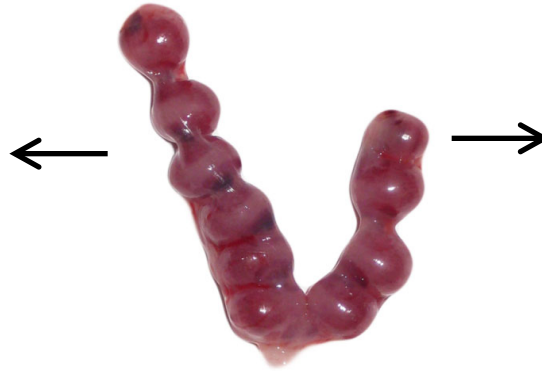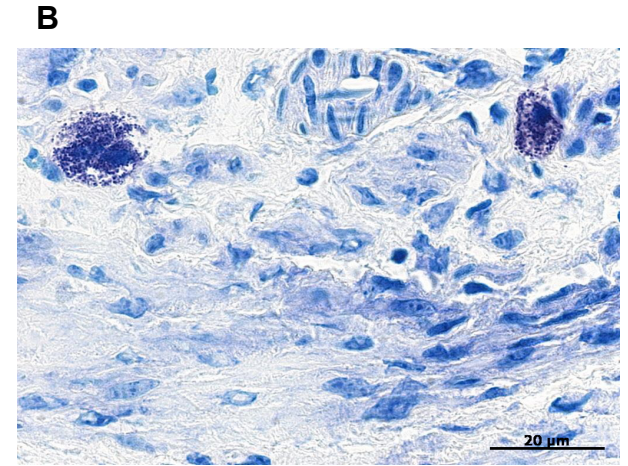

Not reconstituted Horn

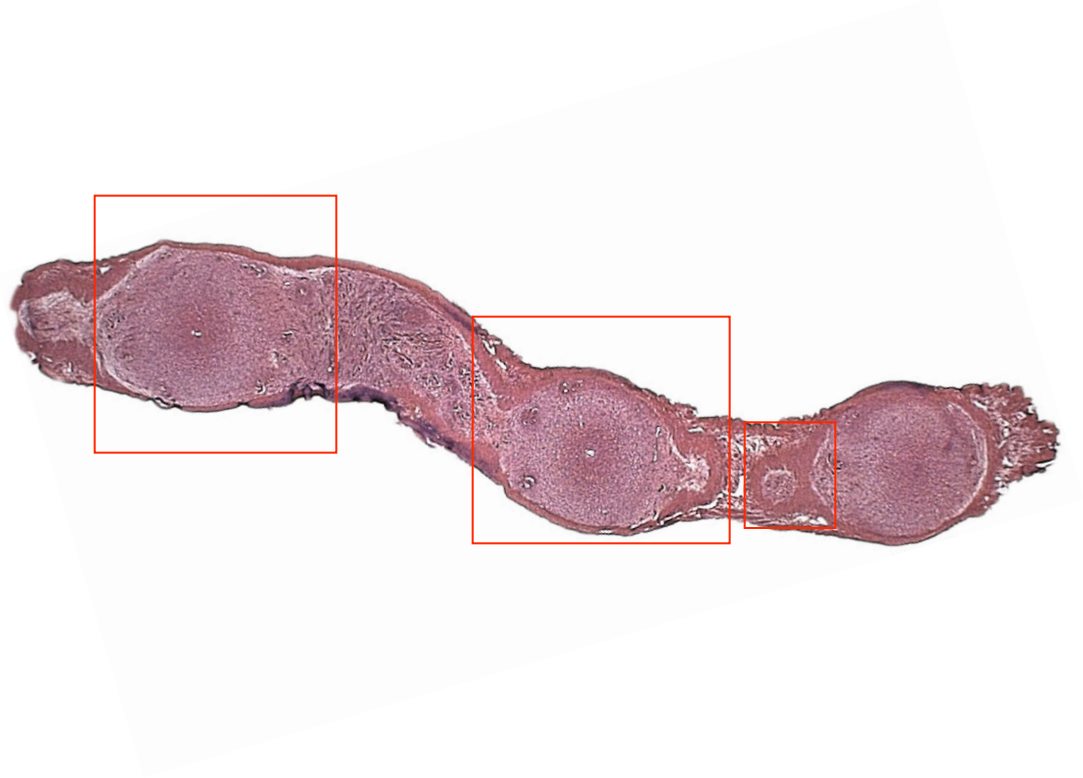

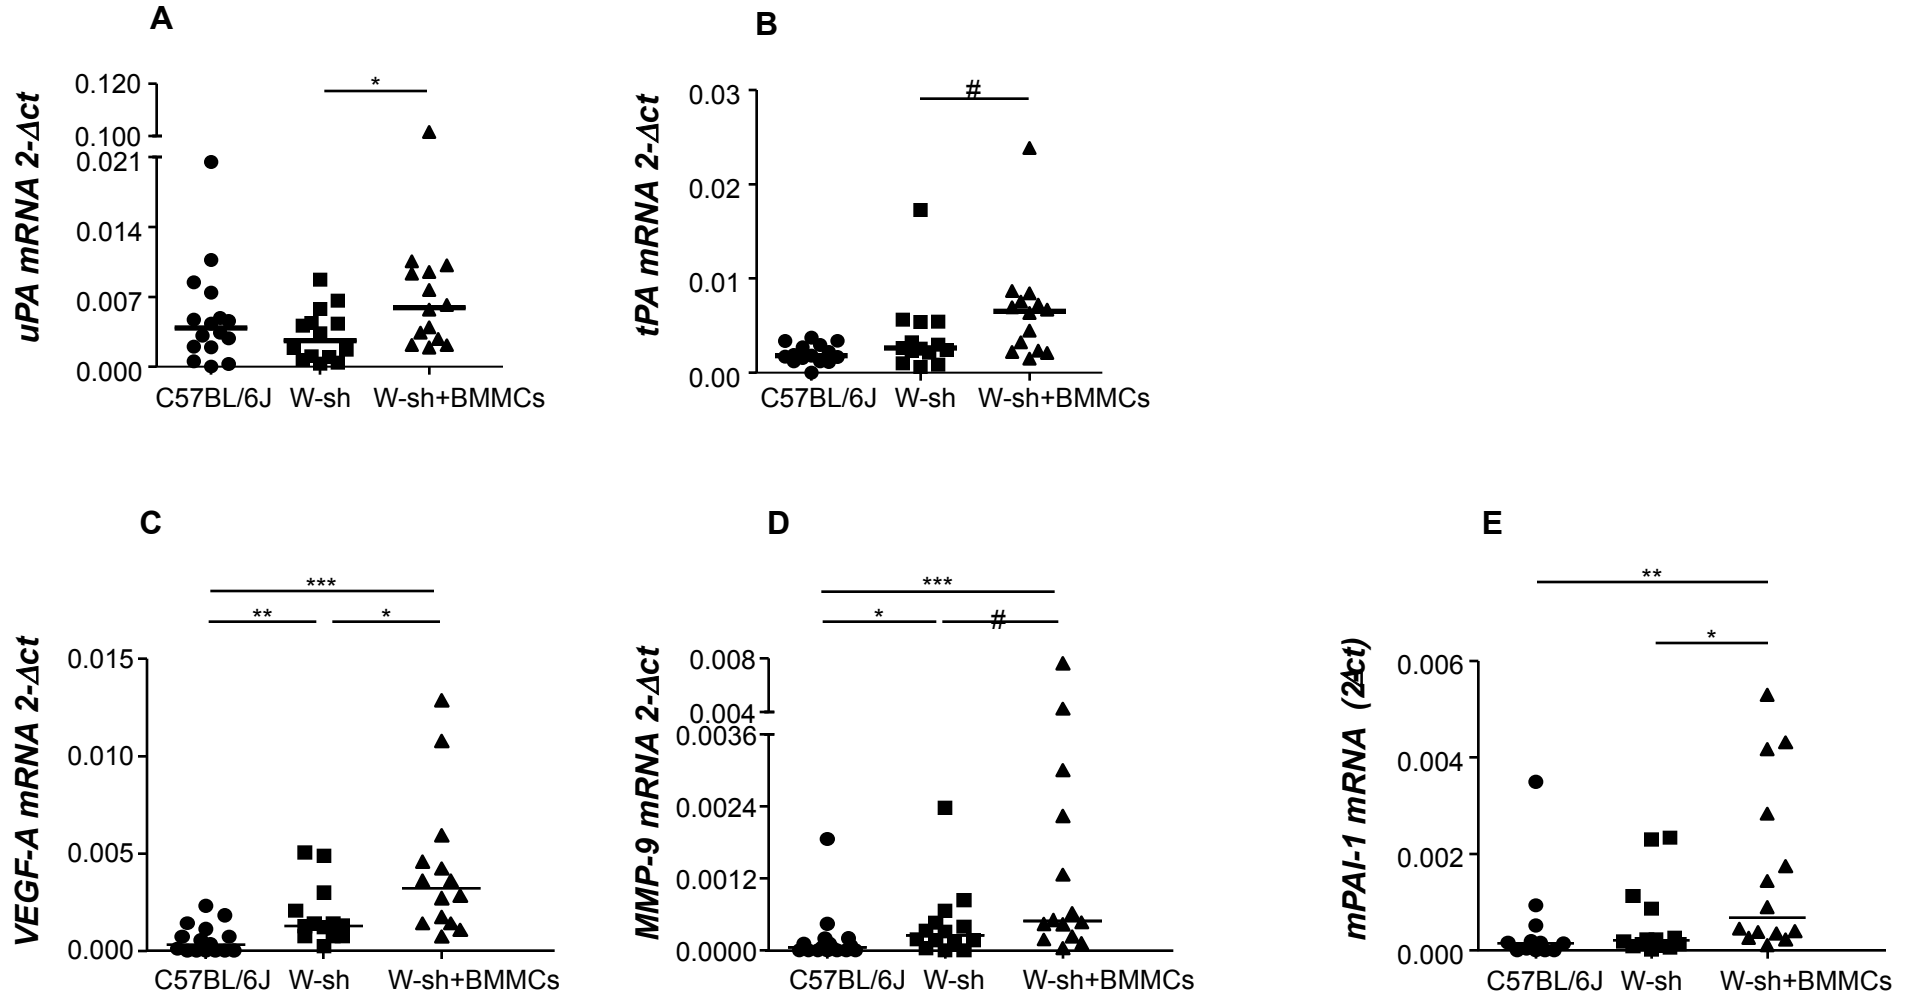

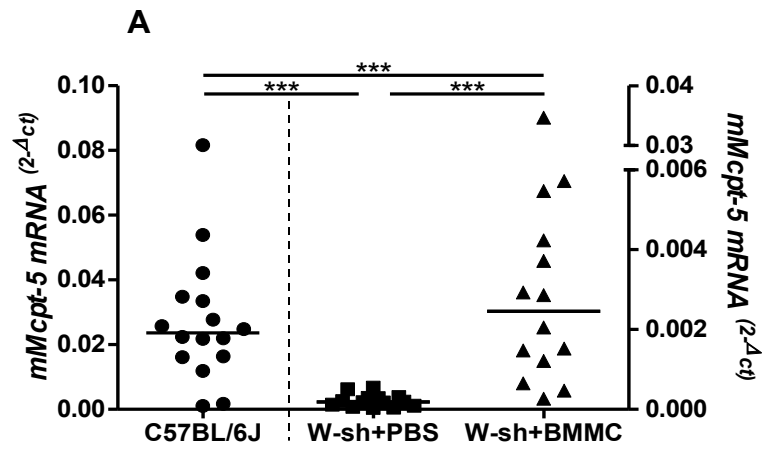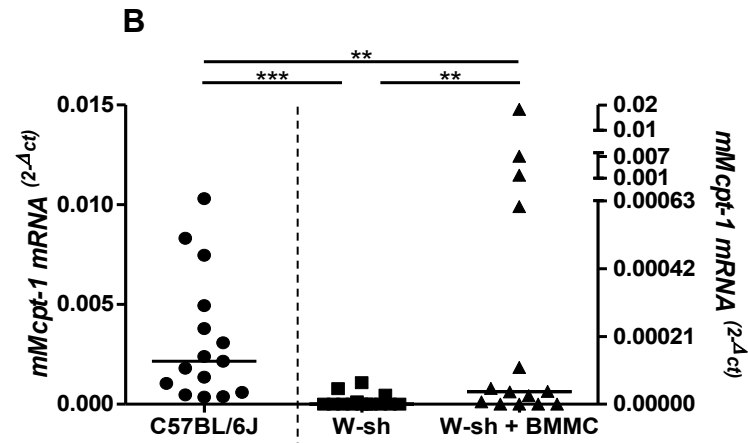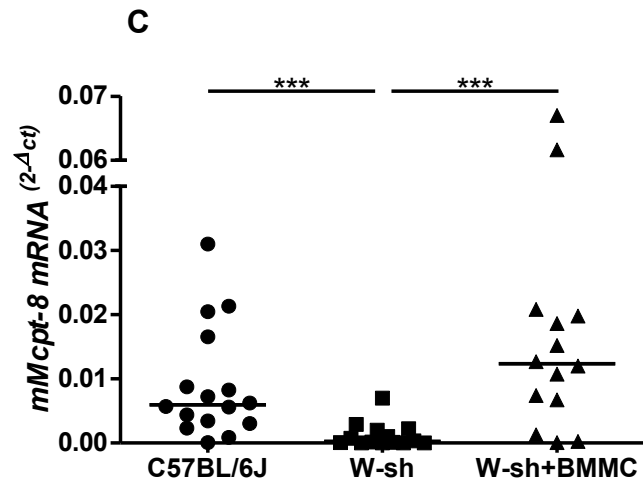



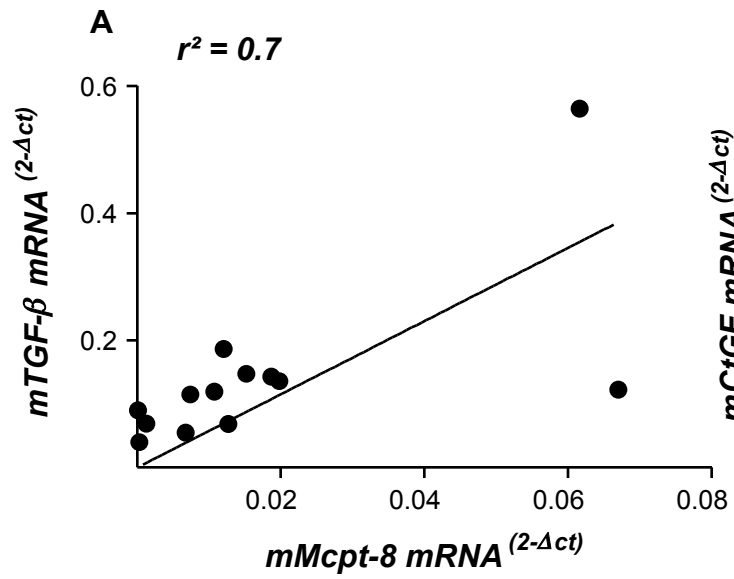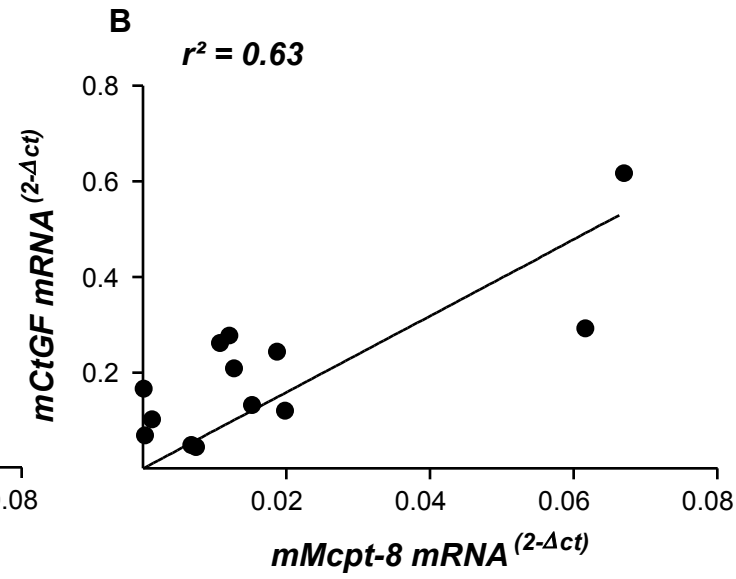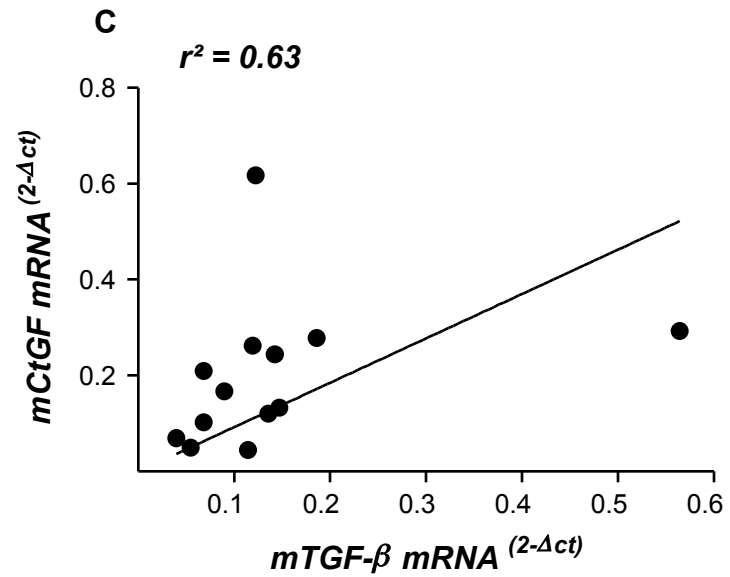

**A**

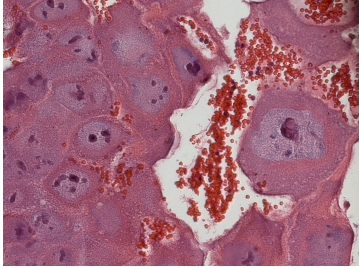

*Normal*

**B**

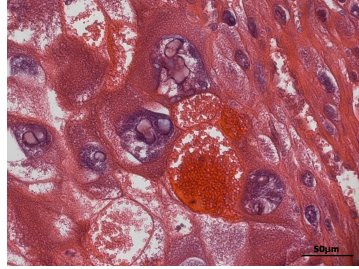

*Abnormal*

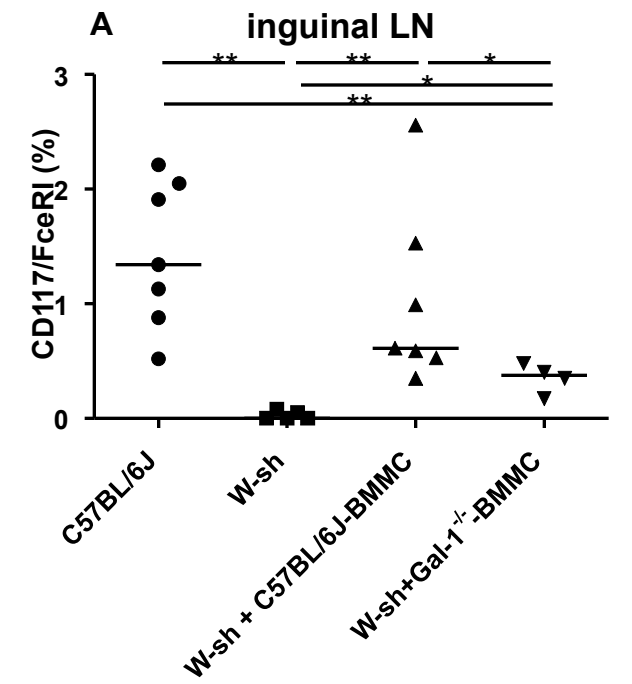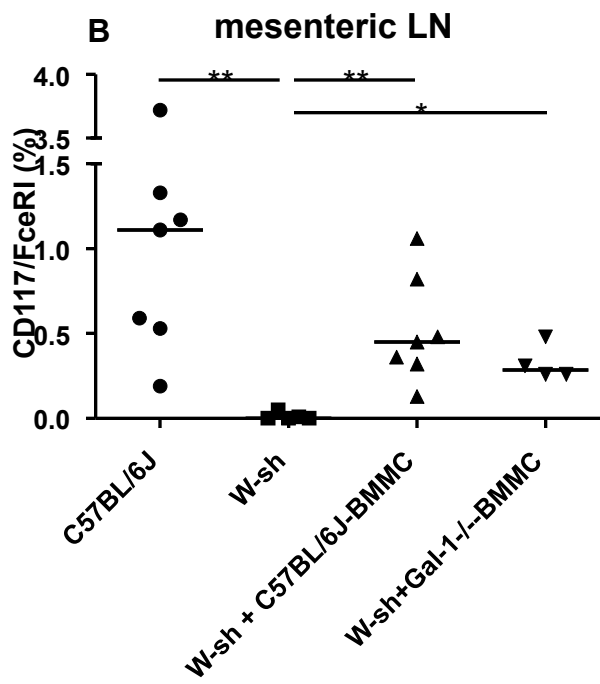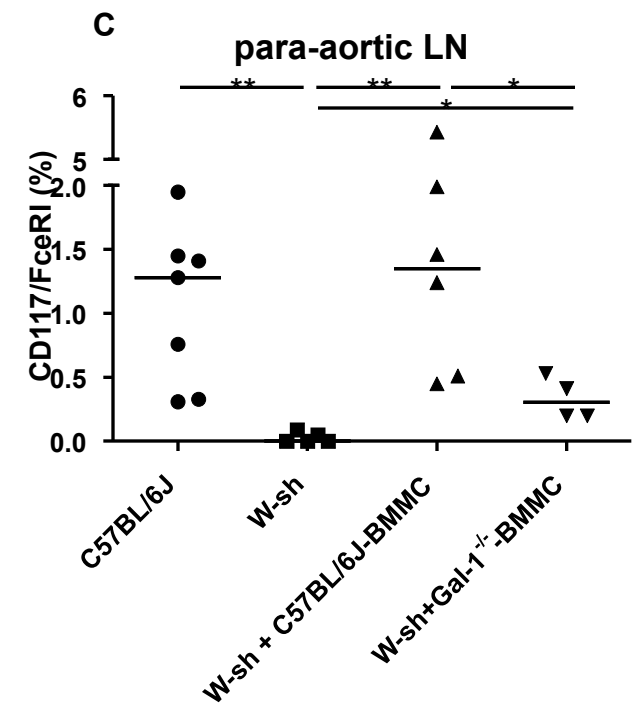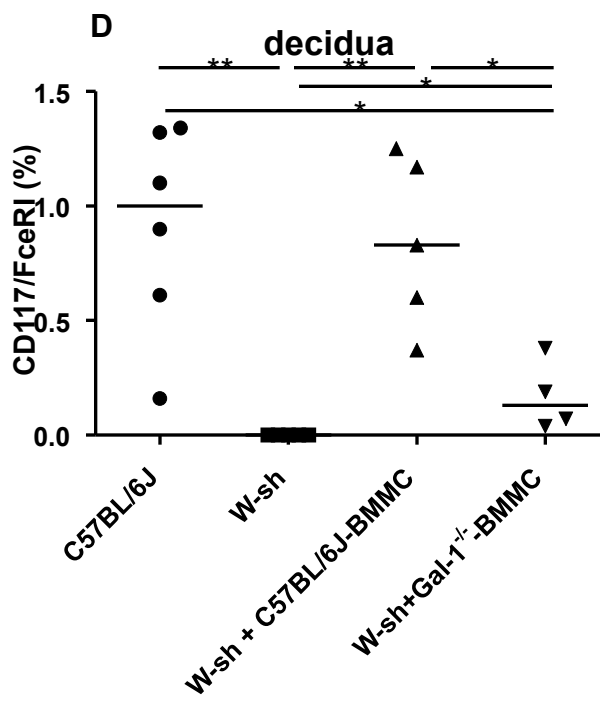

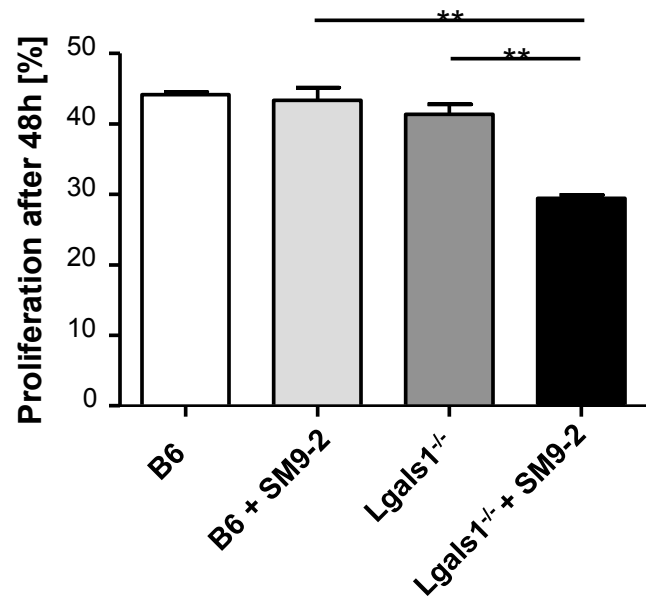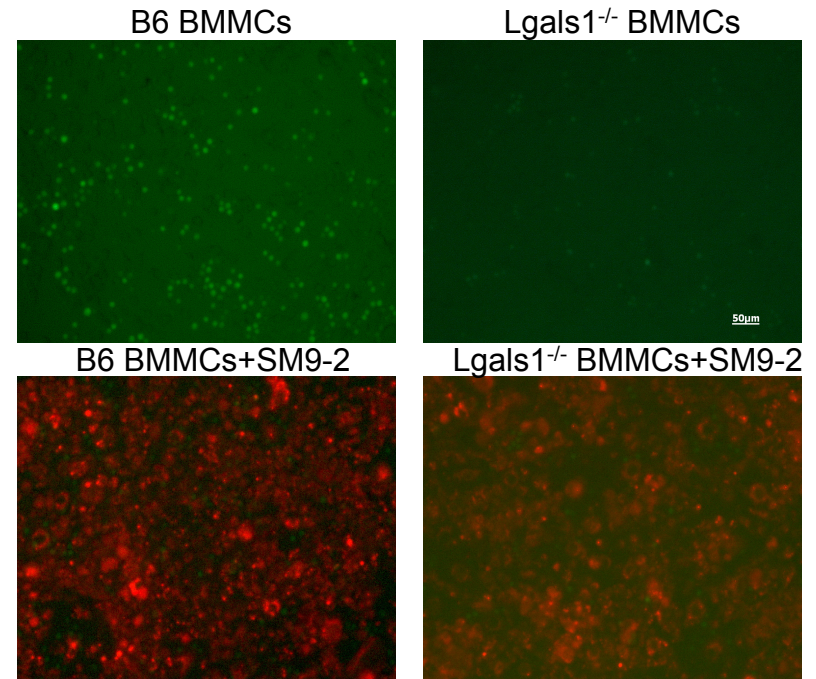

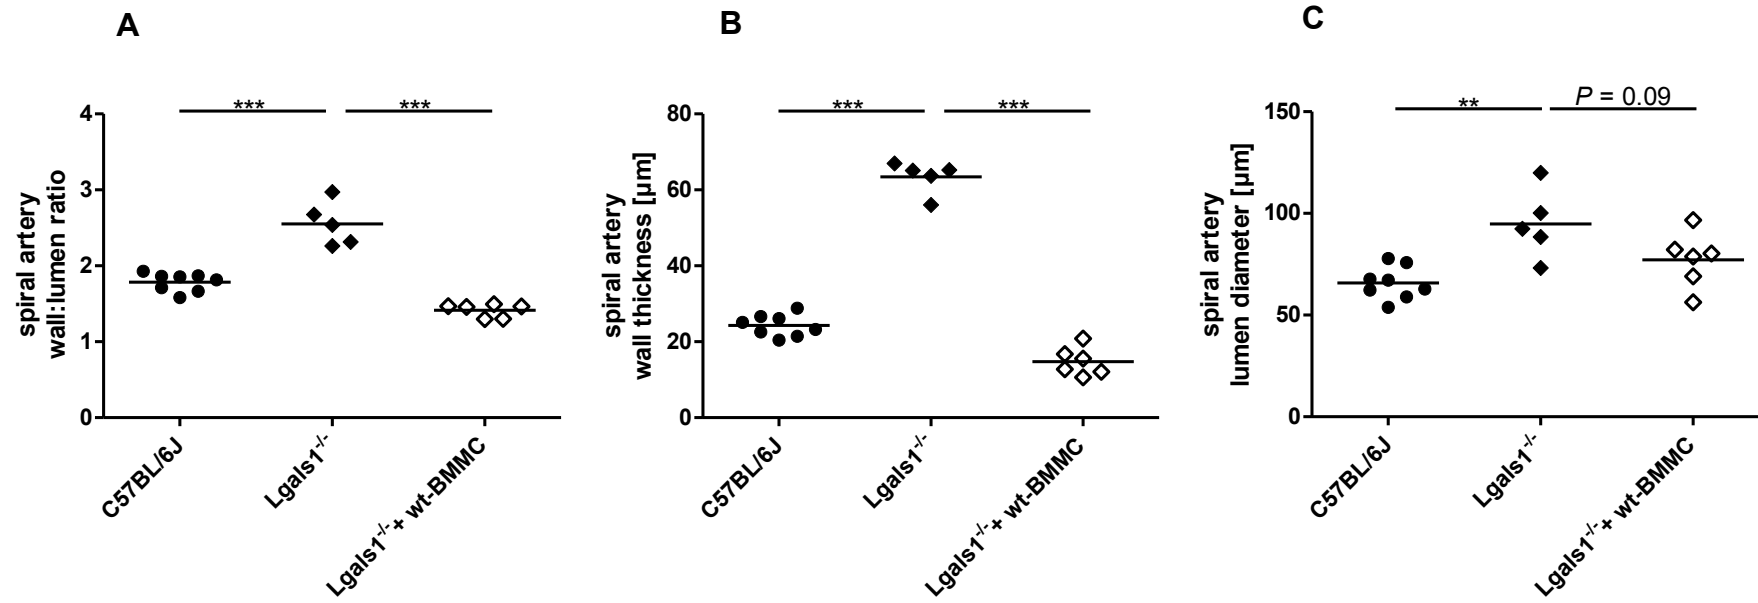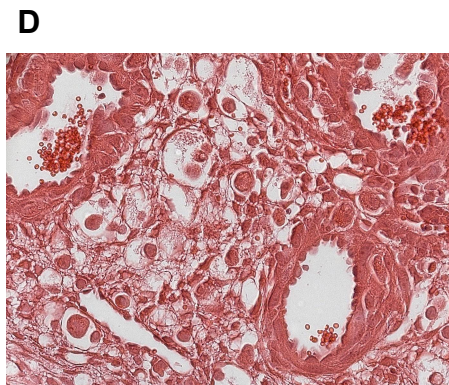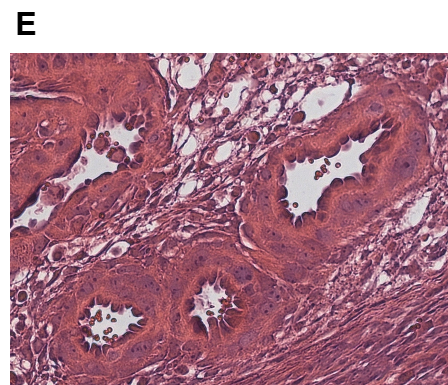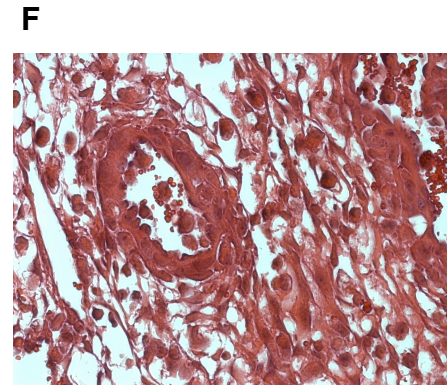

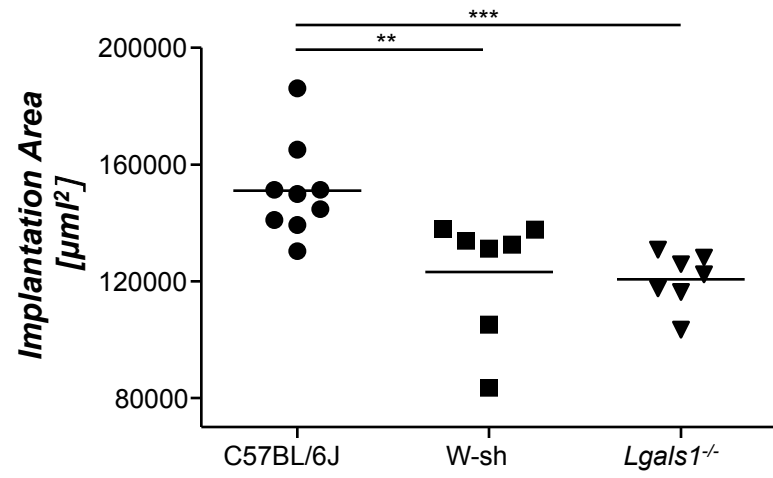

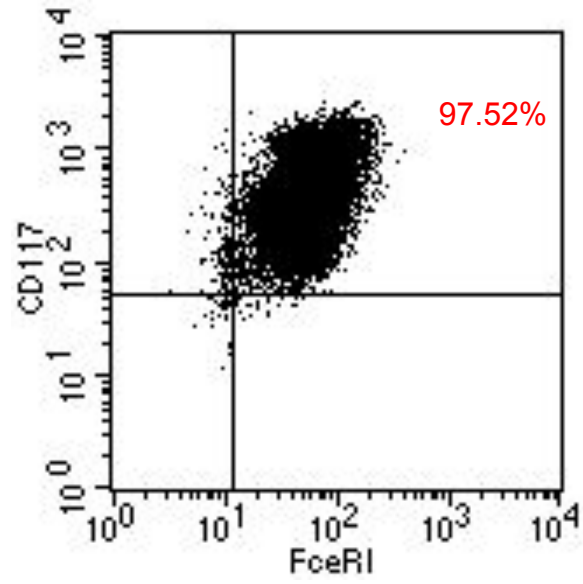

Supplement: cddis2012214x2.pdf [file cddis2012214x2.pdf]
